# Supplementary material for: A hybrid algorithm for ship clutter identification in pulse compression polarimetric radar observations
Source: Copernicus journal article supplement (doi:10.5194/amt-18-4839-2025), 2025-09-26
Supplement: Supplementary file 1 [file amt-18-4839-2025-supplement.zip]

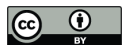

## *Supplement of*

# **A hybrid algorithm for ship clutter identification in pulse compression polarimetric radar observations**

**Shuai Zhang et al.**

*Correspondence to:* Haoran Li (lihr@cma.gov.cn) and Dmitri Moisseev (dmitri.moisseev@helsinki.fi)

- amt-18-4839-2025-supplement-title-page.pdf
- code
  - .DS\_Store
  - KU3200501190540.RAW4F83
  - calc\_feature.py
  - identify.py
  - limit\_region.py
  - read\_sea\_flag.py
  - rf.joblib
  - sea\_flag.txt
  - sensitivity\_lfm.npy
  - snr\_model.npy

The copyright of individual parts of the supplement might differ from the article licence.
